# Supplementary material
Source: Springer Nature journal article supplement (https://www.springermedizin.de/resource/supplementary/13075_2011_3434_MOESM5_ESM.pdf/9694518)

# IL-1 $\beta$

# IL-6

# TNF- $\alpha$

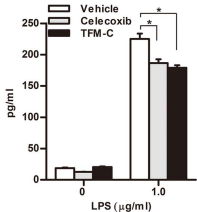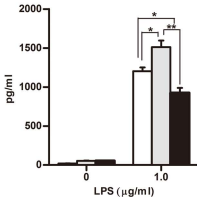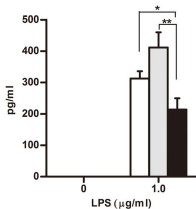

Supplement: MOESM5 [file 9694518]
